# Supplementary material for: Reaction induced supramolecular gelation with the evolution of circularly polarized luminescence
Source: Royal Society of Chemistry journal article supplement (doi:10.1039/d1qm01654g), 2022-01-01
Supplement: d1qm01654g1.pdf [file d1qm01654g1.pdf]

## Supporting Information

### Reaction Induced Supramolecular Gelation with Evolution of Circularly Polarized Luminescence

Kun Li,<sup>a,b</sup> Shuyu Chen,<sup>a</sup> Xuefeng Zhu,<sup>\*a</sup> Huahua Fan,<sup>a,b</sup> Li Zhang<sup>\*a</sup> and Minghua Liu<sup>\*a,b</sup>

a. Beijing National Laboratory for Molecular Science (BNLMS), CAS Key Laboratory of Colloid, Interface and Chemical Thermodynamics, Institute of Chemistry, Chinese Academy of Sciences, Beijing 100190, P. R. China.

b. University of Chinese Academy of Sciences, Beijing 100049, P. R. China.

E-mail: zhuxf06@iccas.ac.cn; zhangli@iccas.ac.cn; liumh@iccas.ac.cn

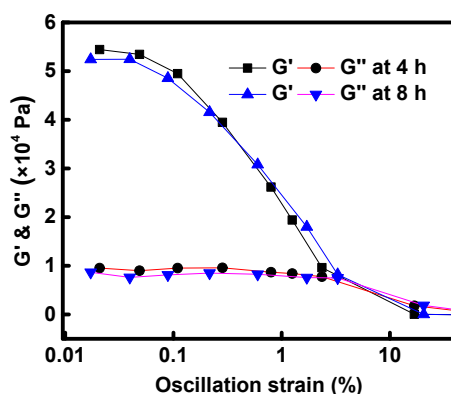

Figure S1. Strain sweep rheometry of 2-NLG after addition of  $\text{NaBH}_4$  4 h and 8 h, respectively, in air at room temperature ( $[\text{2-NLG}] = 1.0 \times 10^{-2}$  M, the molar ratio of 2-NLG to  $\text{NaBH}_4$  was 1:2). The measurement frequency was fixed as 1 Hz.

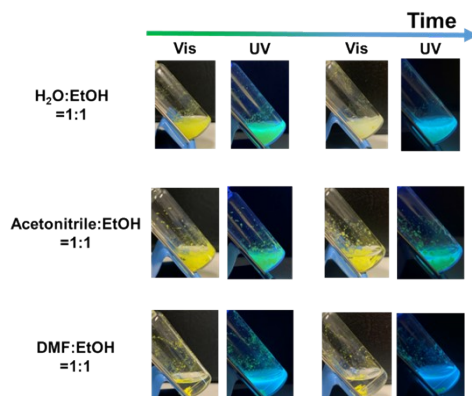

Figure S2. Evolution of 2-NLG systems in the mixed solvents with the addition of  $\text{NaBH}_4$  ( $[\text{2-NLG}] = 1.0 \times 10^{-2}$  M, and the molar ratio of NLG to  $\text{NaBH}_4$  was 1:2).

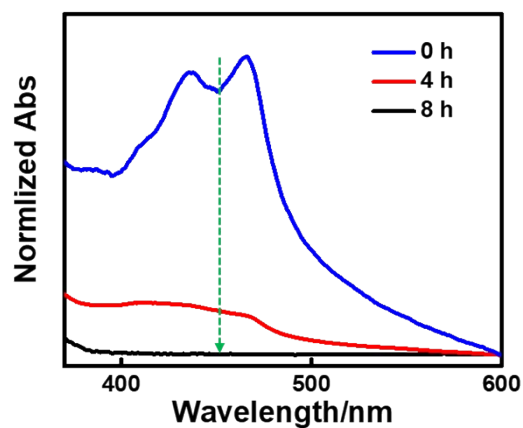

Figure S3. Normalized absorption of 2-NLG systems (Blue: 2-NLG reacted with  $\text{NaBH}_4$  for 0 h. Red: 2-NLG reacted with  $\text{NaBH}_4$  for 4 h. Black: 2-NLG reacted with  $\text{NaBH}_4$  for 8 h). The concentration of 2-NLG was  $1.0 \times 10^{-2} \text{ M}$ , and the molar ratio of 2-NLG to  $\text{NaBH}_4$  was 1:2.

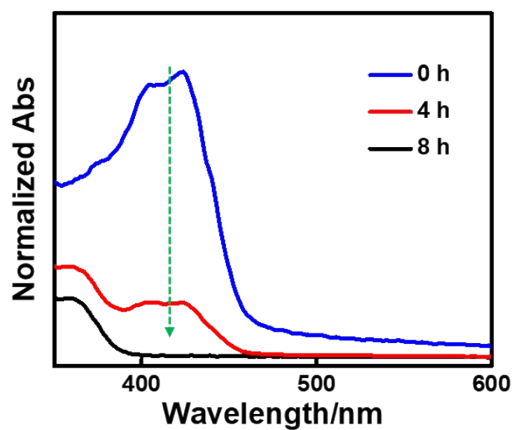

Figure S4. Normalized absorption of 1-NLG systems (Blue: 1-NLG reacted with  $\text{NaBH}_4$  for 0 h. Red: 1-NLG reacted with  $\text{NaBH}_4$  for 4 h. Black: 1-NLG reacted with  $\text{NaBH}_4$  for 8 h). The concentration of 1-NLG was  $1.0 \times 10^{-2} \text{ M}$ , and the molar ratio of 1-NLG to  $\text{NaBH}_4$  was 1:2.

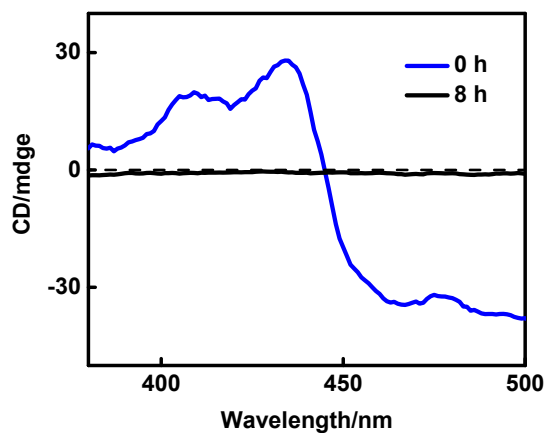

Figure S5. CD spectrum of 1-NLG systems (Blue: 1-NLG reacted with  $\text{NaBH}_4$  for 0 h. Black: 1-NLG reacted with  $\text{NaBH}_4$  for 8 h). The concentration of 1-NLG was  $1 \times 10^{-2} \text{ M}$ , and the molar ratio of 1-NLG to

NaBH<sub>4</sub> was 1:2.

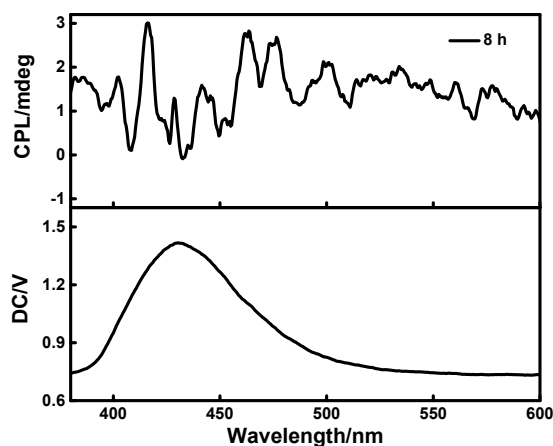

Figure S6. CPL spectra of 1-NLG systems when 1-NLG reacted with NaBH<sub>4</sub> for 8 h. The concentration of 1-NLG was  $1.0 \times 10^{-2}$  M, and the molar ratio of 1-NLG to NaBH<sub>4</sub> was 1:2.

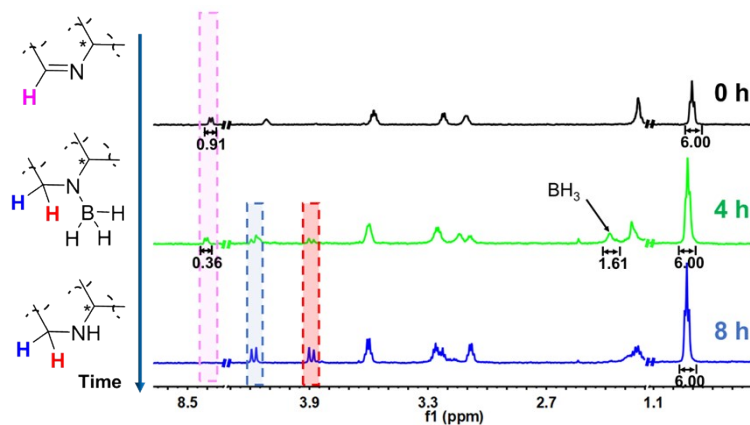

Figure S7. Variation of <sup>1</sup>H NMR spectra (acetonitrile-d<sub>3</sub>, 600 MHz, 343 K) of 2-NLG on reduction time upon addition of NaBH<sub>4</sub>.

We use integration of methyl groups in the alkyl chains of 2-NLG as the reference, and the conversion of imine to secondary amine group is given by the following equation:

$$C = 100 \times \left( \frac{A_0 - A}{A_1} \right)$$

where C is the percentage conversion of imine to secondary amine group; A<sub>0</sub> is the integration of proton in CH=N at 8.06 ppm in the beginning. A is the integration of proton in CH=N at 8.06 ppm after addition of NaBH<sub>4</sub> for 4 h and 8 h, respectively. Therefore, the conversion of imine to secondary amine group is calculated as about 60% at 4 h and approaching 100% at 8 h.

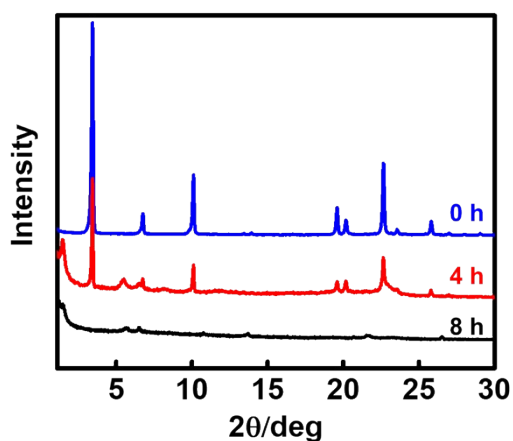

Figure S8. XRD patterns of 1-NLG systems in ethanol (Blue: 1-NLG reacted with  $\text{NaBH}_4$  for 0 h. Red: 1-NLG reacted with  $\text{NaBH}_4$  for 4 h. Black: 1-NLG reacted with  $\text{NaBH}_4$  for 8 h).

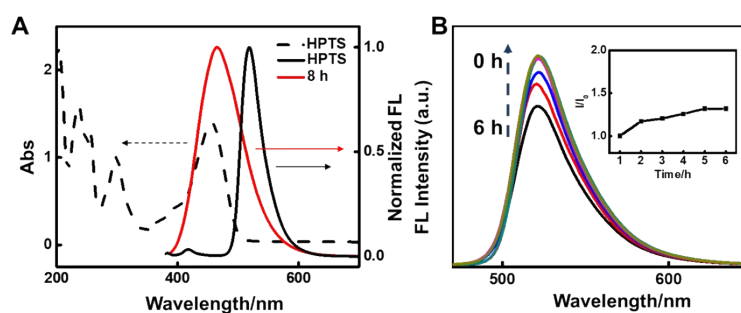

Figure S9. (A) UV spectrum of HPTS (black dot line) and FL spectra of HPTS solution (black solid line) and 2-NLG upon addition of  $\text{NaBH}_4$  for 8 h (red solid line). (B) Time dependence of fluorescence spectra of 2-NLG/HPTS systems upon addition of  $\text{NaBH}_4$  ( $\lambda_{\text{ex}}=450$  nm). Inset: plot of the changes of emission intensity at 515 nm ( $I_0$ : the fluorescence intensity at 0 h;  $I$ : the fluorescence intensity at 0-6 h).

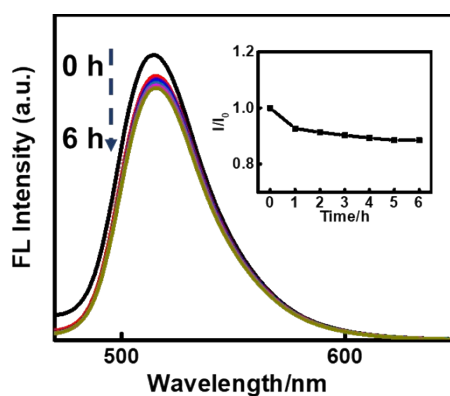

Figure S10. Variation of fluorescence spectra of HPTS in ethanol under addition of  $\text{NaBH}_4$  (without 2-NLG,  $\lambda_{\text{ex}}=360$  nm). Inset: plot of the changes of emission intensity at 515 nm ( $I_0$ : the fluorescence intensity at 0 h;  $I$ : the fluorescence intensity at 0-6 h).
